# Supplementary material for: Lactobacillus gallinarum modulates the gut microbiota and produces anti-cancer metabolites to protect against colorectal tumourigenesis
Source: PubMed Central journal article supplement — Gut. 2021 Dec 22;71(10):2011–21. doi: 10.1136/gutjnl-2020-323951 (PMC9484392; doi:10.1136/gutjnl-2020-323951), 2021-12-22
Supplement: gutjnl-2020-323951supp002.pdf [file gutjnl-2020-323951supp002.pdf]

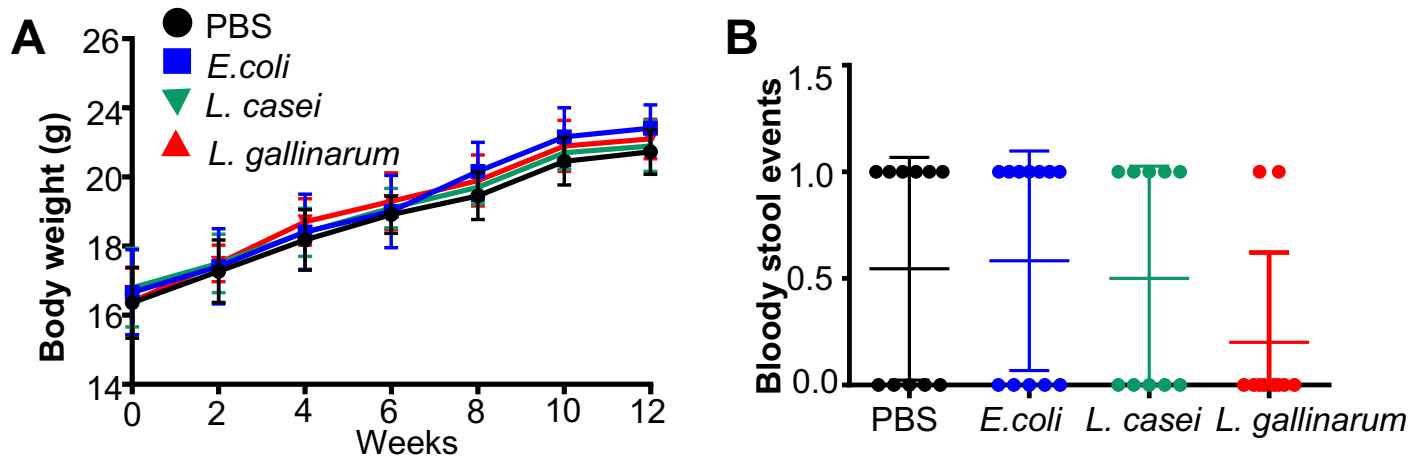

**Supplementary Figure 2. Physiological features of female *Apc*<sup>Min/+</sup> mice before sacrifice.** (A) There was no significant difference in body weight among three groups of mice during the period of gavage. (B) There was no significant difference in bloody stool number and incidence among four groups of mice during the period of gavage.
