# Supplementary material for: Lactobacillus gallinarum modulates the gut microbiota and produces anti-cancer metabolites to protect against colorectal tumourigenesis
Source: HighWire-hosted journal article supplement (doi:10.1136/gutjnl-2020-323951), 2021-12-22
Supplement: gutjnl-2020-323951supp003_data_supplement.pdf [file gutjnl-2020-323951supp003_data_supplement.pdf]

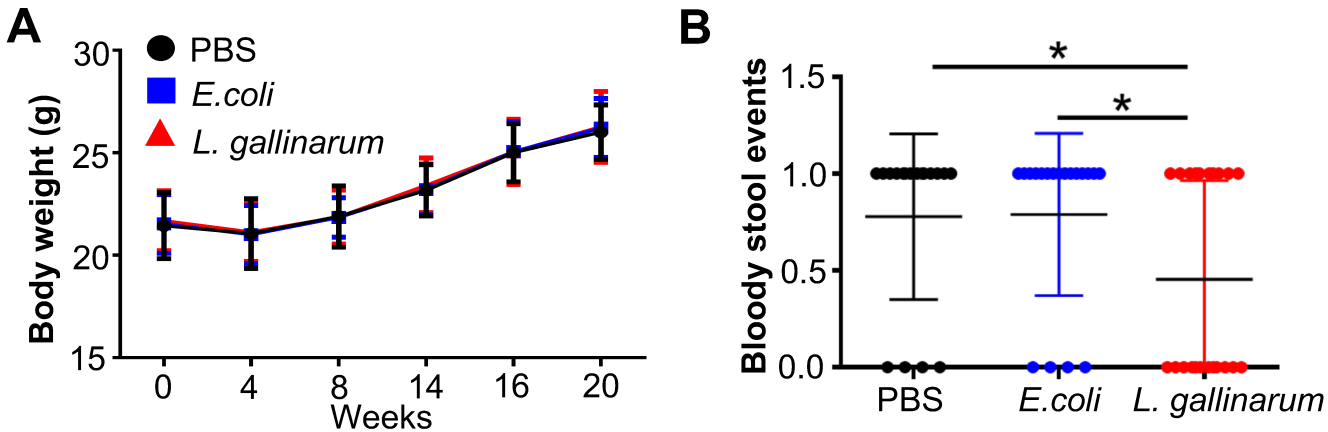

**Supplementary Figure 3. Physiological features of male AOM/DSS-induced CRC mice before sacrifice. (A)** There was no significant difference in body weight among three groups of mice during the period of gavage. **(B)** Number and incidence of bloody stool in *L. gallinarum* group were lower than PBS control and *E. coli* control group after gavage for 20 weeks. *P*-value is calculated from one-way ANOVA. \**p* < 0.05.
